# Supplementary material for: Applicability and Suitability of the Embryological–Clinical Classification of Female Genital Malformations: A Systematic Review
Source: MDPI journal article supplement (doi:10.3390/jcm13102988), 2024-05-19
Supplement: s1 [file s1]

## Appendix A - Embryological-clinical classification

### Embryological-clinical classification for female genito-urinary malformations (2011) [6]

#### 1. Unilateral genito-urinary agenesis or hypoplasia

- 1.1 With contralateral müllerian agenesis
- 1.2 Without contralateral agenesis

#### 2. Uterine duplicity with a blind hemivagina (or atresia) and ipsilateral RA, showing

- 2.1 Large hematocolpos, blind hemivagina. Didelphys or bicornuate uterus with blind hemivagina and ipsilateral RA
- 2.2 Like Gartner's pseudocyst. Bicornuate communicating uterus, atretic blind hemivagina and ipsilateral RA. Herlyn-Werner syndrome
- 2.3 Partial reabsorption of the vaginal septum. Didelphys or bicornis-bicollis uterus with a short vaginal septum or buttonhole, and URA
- 2.4 Complete unilateral vaginal or cervico-vaginal atresia with communicating uteri. Bicornis-unicollis uterus with an anomalous horn and ipsilateral RA
- 2.5 Idem, without communicating uteri. Unicornuate uterus with contralateral unattached but cavitated rudimentary horn and URA

#### 3. Isolated or common uterine or utero-vaginal anomalies, affecting

- A. Paramesonephric or müllerian ducts:
  - A.1. Agenesis or hypoplasias. Müllerian agenesis
  - A.2. Unicornuate uterus with atretic cavitated or non-cavitated rudimentary horn, or bicornuate with cavitated noncommunicated uterine horn, or segmentary atresia, or 'unilateral Rokitansky syndrome'
  - A.3. Didelphys uterus
  - A.4. Bicornuate uterus. Eventually, with a non-communicating cavitated uterine horn
  - A.5. Septate uterus
  - A.6. Arcuate uterus
  - A.7. Anomalies related to DES syndrome. DES syndrome. Hypoplastic and T-shaped uterus. Tricavitated uterus
- B. Müllerian tubercle
  - B.1. Complete vaginal or cervico-vaginal agenesis or atresia
  - B.2. Segmentary atresias. Complete or incomplete transverse vaginal septum
- C. Both Müllerian tubercle and ducts:
  - Complete utero-vaginal agenesis. Rokitansky or MRKH syndrome

#### 4. Accessory uterine masses and other gubernaculum dysfunctions.

Accessory and cavitated uterine masses (ACUM) with normal uterus. Didelphys uterus without RA?

#### 5. Anomalies of the urogenital sinus.

Imperforated hymen. Persistent urogenital sinus. Congenital vesico-vaginal fistula, cloacal anomalies, and other external gastrointestinal or urinary anomalies

#### 6. Malformative combinations

URA: unilateral renal agenesis.  
RA: renal agenesis  
MRKH: Mayer-Rokitansky-Kuster-Hauser.  
DES: diethylstilbestrol.
